# Supplementary material for: Biocatalytic approach as alternative to chemical synthesis of polyaniline/carbon nanotube composite with enhanced electrochemical properties
Source: Royal Society of Chemistry journal article supplement (doi:10.1039/c6ra12352j), 2016-01-01
Supplement: c6ra12352j1.pdf [file c6ra12352j1.pdf]

## Biocatalytic Approach as Alternative to Chemical Synthesis of Polyaniline/Carbon Nanotube Composite with Enhanced Electrochemical Properties

Grigory V. Otrokhov<sup>a</sup>, Galina P. Shumakovich<sup>a</sup>, Maria E. Khlupova<sup>a</sup>, Irina S. Vasil'eva<sup>a</sup>, Igor B. Kaplan<sup>b</sup>, Boris T. Zaitchik<sup>a</sup>, Elena A. Zaitseva<sup>c</sup>, Olga V. Morozova<sup>a</sup>, Alexander I. Yaropolov<sup>a\*</sup>

<sup>a</sup> *Bach Institute of Biochemistry, Research Center of Biotechnology of the Russian Academy of Sciences, Leninsky Ave. 33, bld. 2, 119071 Moscow, Russia*

E-mail: [yaropolov@inbi.ras.ru](mailto:yaropolov@inbi.ras.ru); Tel: +7 (495) 954 4477; Fax: +7 (495) 954 2732

<sup>b</sup> *Department of Chemistry, Moscow State University, Leninskie Gory 1/3, 119991 Moscow, Russia*

<sup>c</sup> *Department of Biology, Moscow State University, Leninskie Gory 1/12, 119234 Moscow, Russia*

### Electronic Supplementary Information

#### 1. General remarks

Aniline (Labtech, Russia) was distilled under reduced pressure before using. Aniline dimer (N-phenyl-1,4-phenylenediamine), ABTS – (2,2'-aminobis-(3-ethylbenzothiazoline-6-sulfonic acid) (Aldrich), Na<sub>2</sub>HPO<sub>4</sub>, citric acid anhydrous (Riedel-de Haen, Germany) were used without further purification. Flexible graphite foil (thickness 0.2 mm) was purchased from (Unichimtek, Russia). Multi-walled carbon nanotubes “Taunit M” (NanoTechCentre Ltd, Russia) were used after treatment with hot 70% nitric acid (MWCNTs). A laccase from the fungus *Trametes hirsuta* (Wulfen) Pilát CF-28 was purified to homogeneity as described previously [Gorshina E.S. et al. Appl. Biochem. Microbiol. 2006, 42(6), 558-563]. The laccase activity was measured spectrophotometrically using 1 mM ABTS as chromogenic substrate ( $\lambda = 420$  nm,  $\epsilon = 36000$  M<sup>-1</sup>cm<sup>-1</sup>) at 24°C in 0.1 M Na-citrate-phosphate buffer, pH 4.5. One unit of activity is defined as the amount of laccase oxidizing 1  $\mu$ m of substrate per min. The specific activity of the enzyme preparation was about 158 U/mg of protein.

Cyclic voltammetry measurements of PANI/MWCNT composite were performed using a BAS CV-50W voltammetric analyzer (Bioanalytical System, USA). An electrochemical cell with a commercial Ag|AgCl electrode (Bioanalytical System, USA) as reference electrode and

platinum sheet as counter electrode were used for an electrochemical investigation. Flexible graphite foil covered with a precise amount of PANI/MWCNT composite served as working electrode. Electrochemical measurements of PANI/MWCNT composites were carried out with electrodes immersed in 1 M H<sub>2</sub>SO<sub>4</sub> aqueous electrolyte.

The morphology of PANI/MWCNT composites was examined by transmission electron microscopy (TEM, LEO 912 AB OMEGA, Carl Zeiss). FTIR spectra were recorded using KBr pellets on a FTIR spectrometer (IRPrestige Fourier, Shimadzu, Japan). Four-point conductivity measurements were carried out with a Loresta GP (Mitsubishi, Japan).

The specific capacitance ( $C_s$ ) of the composites was calculated from the cyclic voltammetric measurements. In the case of non-rectangular shape, the CV curves were integrated for specific capacitance calculation. The formula  $C_s = \frac{\int IdE}{v\Delta Em}$  was used, where  $\Delta E$  is the potential range,  $v$  is the potential scan rate,  $m$  is the mass of electroactive material.

**2. Adsorption of AD on MWCNTs** was monitored by UV-vis spectroscopy. 5 mg of acid treated MWCNTs was incubated in 5 ml of 1M AD solution. The maximum adsorption of AD was registered in 60 min (Figure S1).

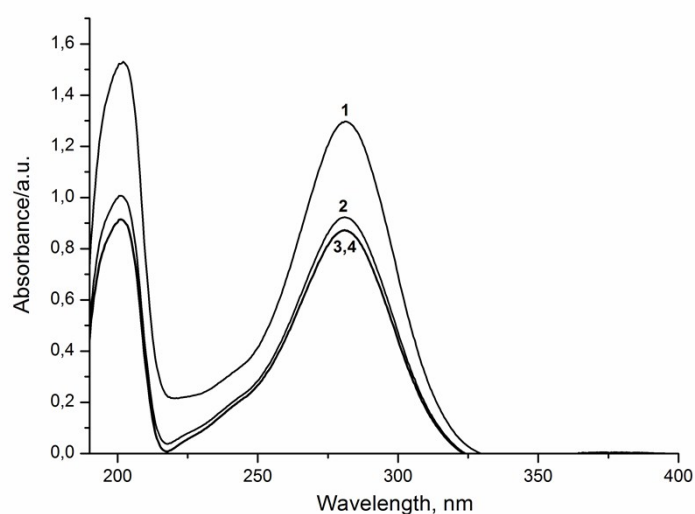

**Fig. S1.** Adsorption of aniline dimer onto acid treated MWCNTs. Adsorption time: (1) – 0 min; (2) – 30 min; (3) – 60 min; (4) – 120 min

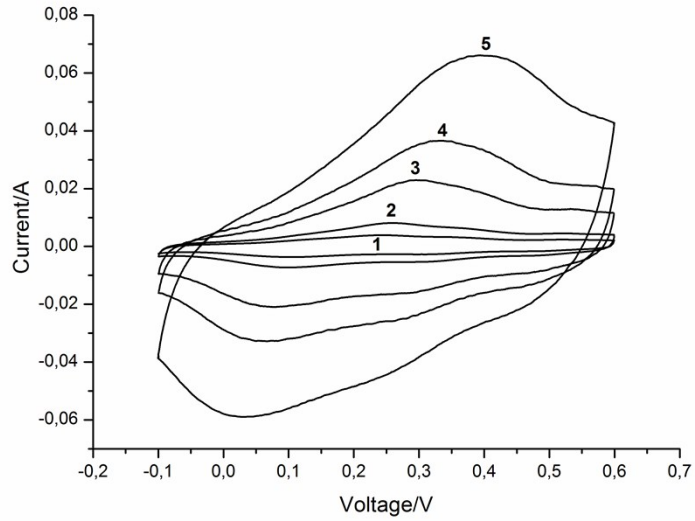

**Fig. S2.** Cyclic voltammograms of PANI/MWCNT composite fabricated after AD preadsorption on MWCNTs at various scan rates: (1) 5 mV/s; (2) – 10 mV/s; (3) – 30 mV/s; (4) – 50 mV/s; (5) – 100 mV/s.

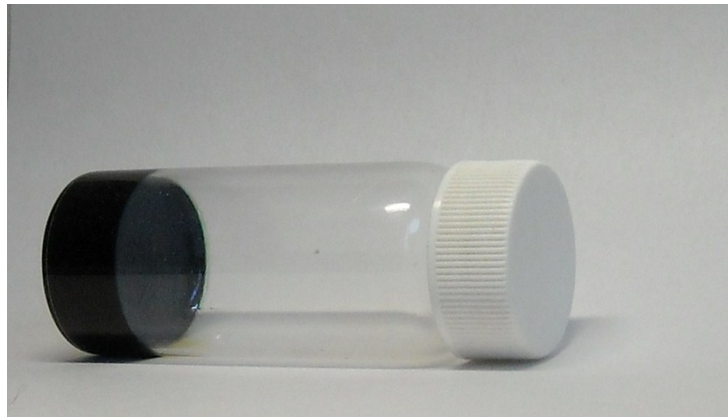

**Fig. S3.** PANI/MWCNT hydrogel synthesized by laccase-catalyzed method.
